# Supplementary material for: A case-study on the accuracy of mass balances for xenobiotics in full-scale wastewater treatment plants
Source: Royal Society of Chemistry journal article supplement (doi:10.1039/c3em30884g), 2013-01-01
Supplement: c3em30884g.pdf [file c3em30884g.pdf]

## Supporting Information

### Distribution fitting

|                | Log-normal | Normal | Weibull | n   |
|----------------|------------|--------|---------|-----|
| Atenolol       | 0.0628     | 0.0799 | 0.1523  | 108 |
| Carbamazepine  | 0.0617     | 0.1918 | 0.1024  | 108 |
| Diclofenac     | 0.1304     | 0.1141 | 0.0901  | 96  |
| Ketoprofen     | 0.0878     | 0.0942 | 0.0519  | 96  |
| Lidocaine      | 0.0574     | 0.1549 | 0.0694  | 108 |
| Bentazone      | 0.0971     | 0.1741 | 0.1381  | 21  |
| Diuron         | 0.1354     | 0.2551 | 0.1367  | 18  |
| Isoproturon    | 0.2144     | 0.2164 | 0.2351  | 8   |
| MCPA           | 0.1083     | 0.1321 | 0.2176  | 19  |
| Terbuthylazine | 0.2583     | 0.4212 | 0.2935  | 38  |

**Table 1** Kolmogorov-Smirnov goodness-of-fit test statistics T; all log-normal fits were significant at  $\alpha = 0.05$  except for terbuthylazine.

The Kolmogorov-Smirnov goodness-of-fit test statistics were chosen to identify the distribution that best describes the data of measured loads. Normal, Weibull and log-normal distributions were tested as specified hypothesized distributions  $F^*(x)$  against the empirical distribution of the measured loads  $S(x)$ . The test statistic T is calculated by the greatest vertical distance max between  $F^*(x)$  and  $S(x)$

$$T = \max |F^*(x) - S(x)| \quad (1)$$

and subsequently compared to the quantile obtained from the Kolmogorov-Smirnov-distribution table at a given significance level  $1-\alpha$  (here:  $\alpha = 0.05$ ).
